# Supplementary figures and images for: Inflammatory Induction of Human Resistin Causes Insulin Resistance in Endotoxemic Mice
Source: PubMed Central journal article supplement — Diabetes. 2011 Feb 21;60(3):775–83. doi: 10.2337/db10-1416 (PMC3046838; doi:10.2337/db10-1416), 2011-02-21

**Figure S1**

**A**

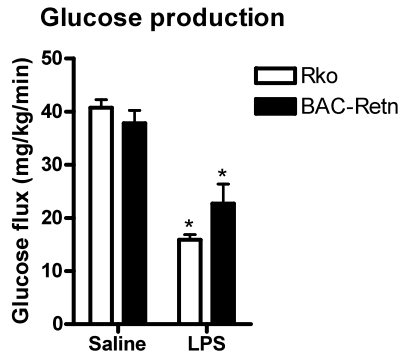

**B**

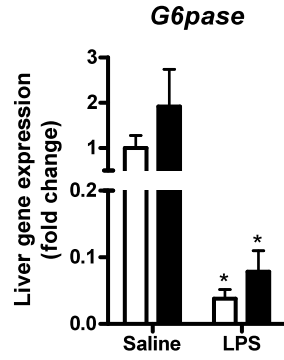

**C**

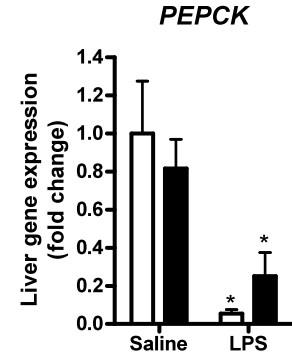

**D**

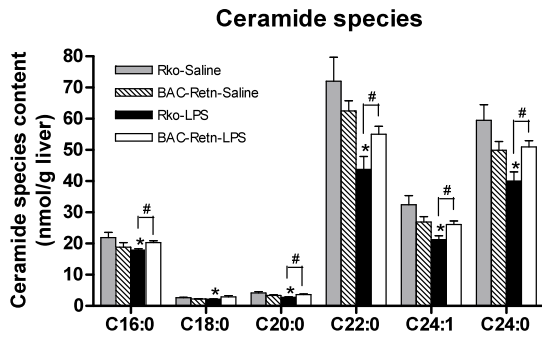

**E**

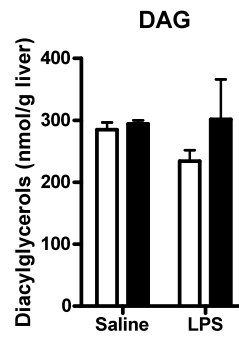

**F**

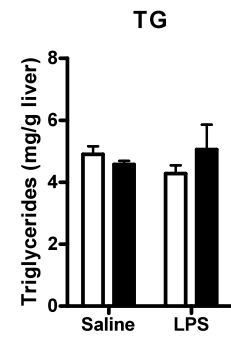

**G**

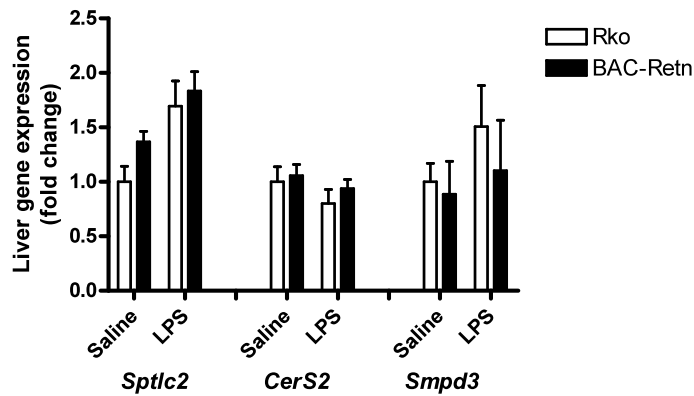

Figure S2

A

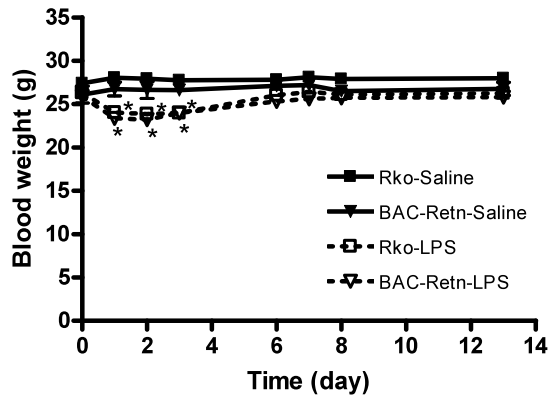

B

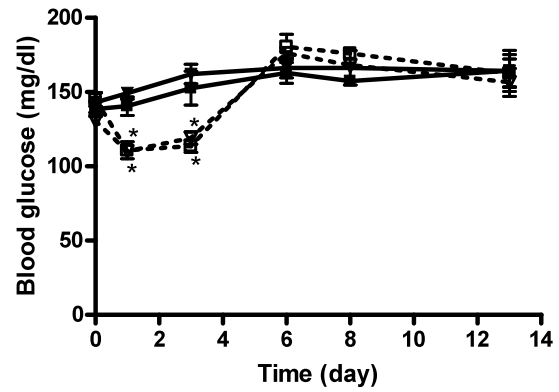

C

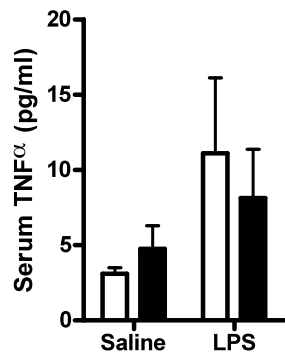

D

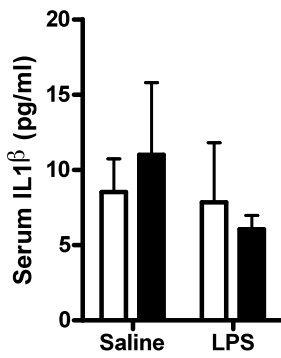

Figure S3

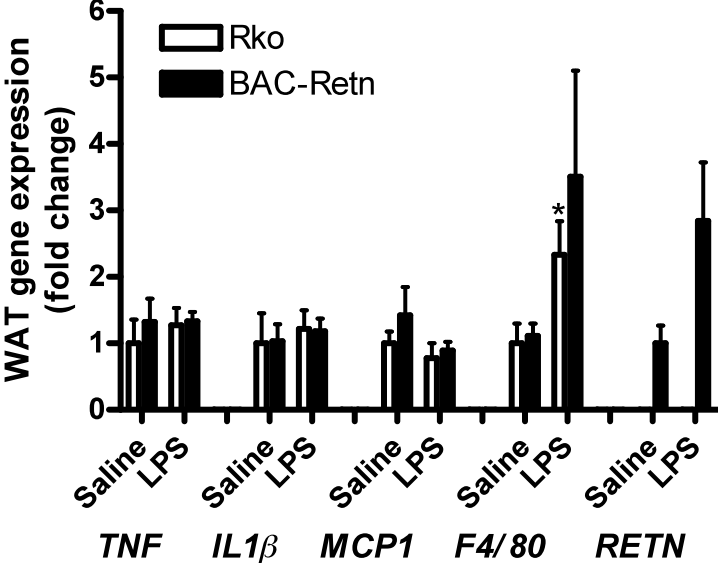

Figure S4

A

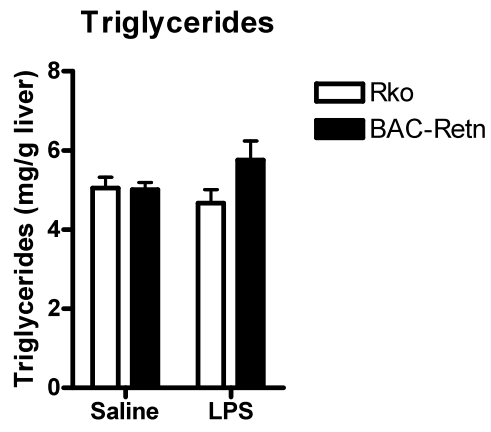

B

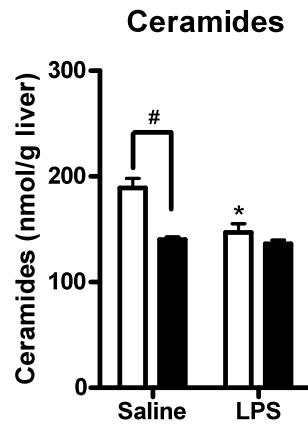

Figure S5

A

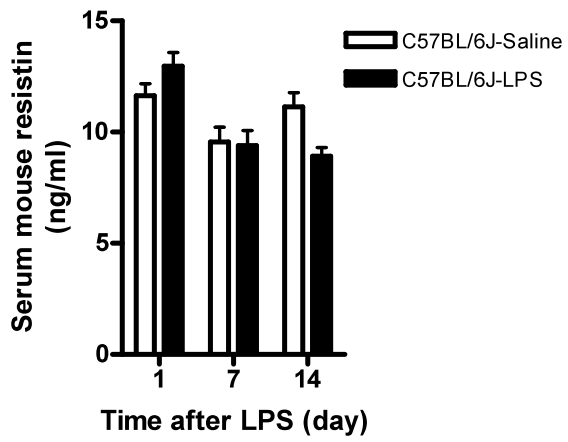

B

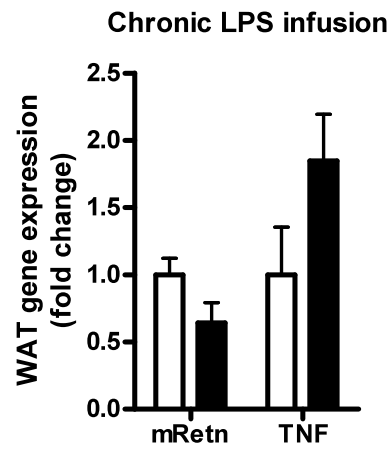

C

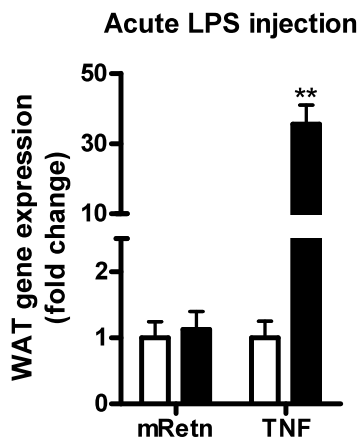

Supplement: supp_db10-1416_DB101416SupplementaryData2.pdf [file supp_db10-1416_DB101416SupplementaryData2.pdf]
